# Supplementary material
Source: PubMed Central journal article supplement (PMC4868053)
Supplement: NIHMS784649-supplement-Supplementary_data.pdf [file NIHMS784649-supplement-Supplementary_data.pdf]

**Supplementary Table 1a: The significance of each variable included in the multivariate model, tested separately, at Village level**

| Variable              | Coefficient<br>(univariate) | Ch -2LL* | Significance of the<br>change ( <i>P</i> -value) |
|-----------------------|-----------------------------|----------|--------------------------------------------------|
| brla_log              | 0.22362                     | 68.49    | < 0.001                                          |
| roads_len             | 0.101025                    | 104.24   | < 0.001                                          |
| elev_avg              | 6.24E-04                    | 39.09    | < 0.001                                          |
| elev_avg <sup>2</sup> | -9.30E-07                   | -        | -                                                |
| markets_km            | -0.008412                   | 7.158    | 0.00746                                          |
| hpop_urban_log        | 0.10091                     | 10.704   | 0.00107                                          |
| hpop_rural_log        | 0.13401                     | 12.53    | < 0.001                                          |
| cropmax               | 0.021038                    | 112.66   | < 0.001                                          |

\*Change in -2 Log-likelihood upon removal of variable

**Supplementary Table 1b: The significance of each variable included in the multivariate model, tested separately, at District level**

| Variable                    | Coefficient<br>(univariate) | Ch -2LL* | Significance of the<br>change ( <i>P</i> -value) |
|-----------------------------|-----------------------------|----------|--------------------------------------------------|
| brla_dens_log               | 0.11702                     | 42.95    | < 0.001                                          |
| rice_area                   | 1.79E-04                    | 4.72     | 0.02981                                          |
| elev_avg                    | 9.40E-04                    | 71.12    | < 0.001                                          |
| elev_avg <sup>2</sup>       | -5.51E-07                   | -        | -                                                |
| hpop_urban_log              | -0.088239                   | 83.63    | < 0.001                                          |
| hpop_urban_log <sup>2</sup> | 0.047817                    | -        | -                                                |
| hpop_rural_log              | 0.012766                    | 12.32    | 0.00211                                          |
| hpop_rural_log <sup>2</sup> | 0.002816                    | -        | -                                                |
| settlement                  | 0.029827                    | 32.41    | < 0.001                                          |
| road_len                    | 1.24E-07                    | 2.91     | 0.23340                                          |
| Number of visits            | -3.48E-04                   | 144.33   | < 0.001                                          |

\*Change in -2 Log-likelihood upon removal of variable

**Supplementary Table 2: Results of the autologistic regression model for districts, including the number of PDS visits per district as a covariate**

| Variable         | Mean      | SD       | Odds Ratio | Ch -2LL* | Sig. of change |
|------------------|-----------|----------|------------|----------|----------------|
| (Intercept)      | -4.171    | 0.09523  | -          | -        | -              |
| brla_dens_log    | 0.2224    | 0.02176  | 1.249      | 109.28   | <0.0001        |
| rice_area        | 0.000599  | 9.85E-05 | 1.001      | 34.15    | <0.0001        |
| elev_avg         | 2.13E-03  | 2.20E-04 | 1.002      | 96.52    | <0.0001        |
| elev_avg2        | -1.81E-06 | 2.20E-07 | 1.000      | 71.19    | <0.0001        |
| hpop_urban_log   | 0.021     | 0.04688  | 1.021      | 0.20     | 0.654          |
| hpop_urban_log2  | -0.02515  | 0.007937 | 0.975      | 10.11    | 0.0014         |
| hpop_rural_log   | 0.2904    | 0.05779  | 1.337      | 23.84    | <0.0001        |
| hpop_rural_log2  | -0.0505   | 0.009892 | 0.951      | 25.47    | <0.0001        |
| settlement       | 0.08773   | 0.008432 | 1.092      | 109.43   | <0.0001        |
| road_len         | 5.44E-07  | 1.03E-07 | 1.000      | 27.39    | <0.0001        |
| Number of visits | -0.00059  | 3.53E-05 | 0.999      | 293.85   | <0.0001        |
| ArT              | 26.21     | 1.948    | -          | 187.19   | <0.0001        |

\*Change in -2 Log-likelihood upon removal of variable
